# Supplementary material for: Ecological diversification of sea catfishes is accompanied by genome-wide signatures of positive selection
Source: PubMed Central journal article supplement (PMC11579386; doi:10.1038/s41467-024-54184-3), 2024-11-20
Supplement: 41467_2024_54184_MOESM3_ESM.pdf [file 41467_2024_54184_MOESM3_ESM.pdf]

## Description of Additional Supplementary Files

### **Supplementary Data 1**

Description: Samples used in the current study, including associated specimen, tissue number, and sample location.

### **Supplementary Data 2**

Description: Information of the 4 subsets used in this study. Genes are specified.

### **Supplementary Data 3**

Description: Habitat occupancy dataset.

### **Supplementary Data 4**

Description: Summary of the genome statistics for the SPAdes preassemblies.

### **Supplementary Data 5**

Description: Results of Benchmarking genome quality using the Universal Single-Copy Orthologs (BUSCO) for the eukaryota\_odb10 and actinopterygii\_odb10 datasets. Percentage of complete (C), fragmented (F), and missing (M) eukaryota\_odb10 and actinopterygii\_odb10 single copy orthologs are detailed.

### **Supplementary Data 6**

Description: Summary of the genome statistics for the RagTag assemblies.

### **Supplementary Data 7**

Description: OrthoFinder Statistics.

### **Supplementary Data 8**

Description: Age estimates for MCMCTrees.

### **Supplementary Data 9**

Description: Time spent by ariid lineages in each state on the tree. raw: raw time; prop: proportional time.

### **Supplementary Data 10**

Description: Candidate genes used in this study.

### **Supplementary Data 11**

Description: Colored cells indicate genes under positive selection for the marine to freshwater transitions, considering topological uncertainty, and detected in at least seven out of ten trees. Genes in bold represent PSGs detected in at least nine out of ten trees. GUIs: genes under intensification of selection; GURS: genes under

relaxation of selection.

### **Supplementary Data 12**

Description: Genes under positive selection for the stenohaline to euryhaline transitions, considering topological uncertainty, and detected in at least seven out of ten trees. Genes in bold represent PSGs detected in at least nine out of ten trees. GUIs: genes under intensification of selection; GURS: genes under relaxation of selection.

### **Supplementary Data 13**

Description: Genes under positive selection for the benthic to pelagic planktivore (PP) transitions, considering topological uncertainty, and detected in at least seven out of ten trees. Genes in bold represent PSGs detected in at least nine out of ten trees. GUIs: genes under intensification of selection; GURS: genes under relaxation of selection.

### **Supplementary Data 14**

Description: Comparison of the number of genes under positive selection for the three habitat transitions, analyzed using three different HyPhy methods. Genes were considered under selection if detected in the master tree, at least seven out of ten trees, or nine out of ten trees. GUIs: genes under intensification of selection; GURS: genes under relaxation of selection.

### **Supplementary Data 15**

Description: Number of genes under positive selection for habitat transitions, both during the transition and during and after the transition, along with a comparison between the adaptive radiation and the remaining test clades, considering topological uncertainty. Results are presented for analyses conducted using only the master tree, 9-10 trees, and 7 or more trees.

### **Supplementary Data 16**

Description: Convergent and parallel positively selected sites identified using MEME. Amino acid sites exhibiting convergent or parallel evolution under positive selection, as identified by the mixed effects model of evolution (MEME) in HyPhy (using a likelihood ratio test with a significance threshold of  $p < 0.1$ ).

### **Supplementary Data 17a**

Description: phylANOVA results of the repeat content characterization. Significant p values are highlighted in bold.

### **Supplementary Data 17b**

Description: FDR-corrected p values for phylANOVA results of repeat content characterization. No significant p values were observed prior to correction.
